# Supplementary material for: Continuous electrical pumping membrane process for seawater lithium mining
Source: Royal Society of Chemistry journal article supplement (doi:10.1039/d1ee00354b), 2021-01-01
Supplement: d1ee00354b1.pdf [file d1ee00354b1.pdf]

1

## Supplementary Information

2

### Continuous Electrical Pumping Membrane Process for Seawater

3

### Lithium Mining

4 Zhen Li, Chunyang Li, Xiaowei Liu, Li Cao, Peipei Li, Ruicong Wei, Xiang Li, Dong Guo,

5 Kuo-Wei Huang, Zhiping Lai\*

6 Division of Physicals Science and Engineering, King Abdullah University of Science and

7 Technology (KAUST), Thuwal, 23955-6900, Saudi Arabia

8 \*Corresponding Author: Zhiping Lai (Zhiping.lai@kaust.edu.sa)

9

10

11

#### 12 (1) Supplementary tables

| Process                  | Li concentration of feed solution (ppm) | Li/Mg selectivity              | Li/Na Selectivity              | Voltage (V) | Lithium extraction rate mg/(ppm·dm <sup>2</sup> ·h) | Literature        |
|--------------------------|-----------------------------------------|--------------------------------|--------------------------------|-------------|-----------------------------------------------------|-------------------|
| Nanofiltration membranes | 700                                     | 11.33                          | -                              | 1.75        | 0.21                                                | [1]               |
| Bipolar membrane         | 159                                     | 30                             | -                              | 15          | 4.30                                                | [2]               |
| Liquid-membrane          | 1000                                    | 15                             | -                              | 3.00        | 12.96                                               | [3]               |
| Ionic liquid membrane    | 0.17                                    | 39.7                           | 0.80                           | 3.00        | 7.59                                                | [4]               |
| Si doped LATP            | 0.17                                    | -                              | -                              | 0.04        | 0.97                                                | [5]               |
| LATP                     | 0.17                                    | -                              | -                              | 4.52        | 11.18                                               | [6]               |
| <b>Glass-type LLTO</b>   | <b>0.21</b>                             | <b>4.5 million<sup>a</sup></b> | <b>1.7 million<sup>a</sup></b> | <b>3.25</b> | <b>13.43<sup>b</sup></b>                            | <b>This study</b> |

a. The selectivity of our process is the nominal selectivity that is calculated based on the data after 5 stages.

b. The lithium extraction rate is calculated from the first stage.

13 Table S1. Comparison of the lithium extraction rate in literatu

14

15 (2) Supplementary Figures

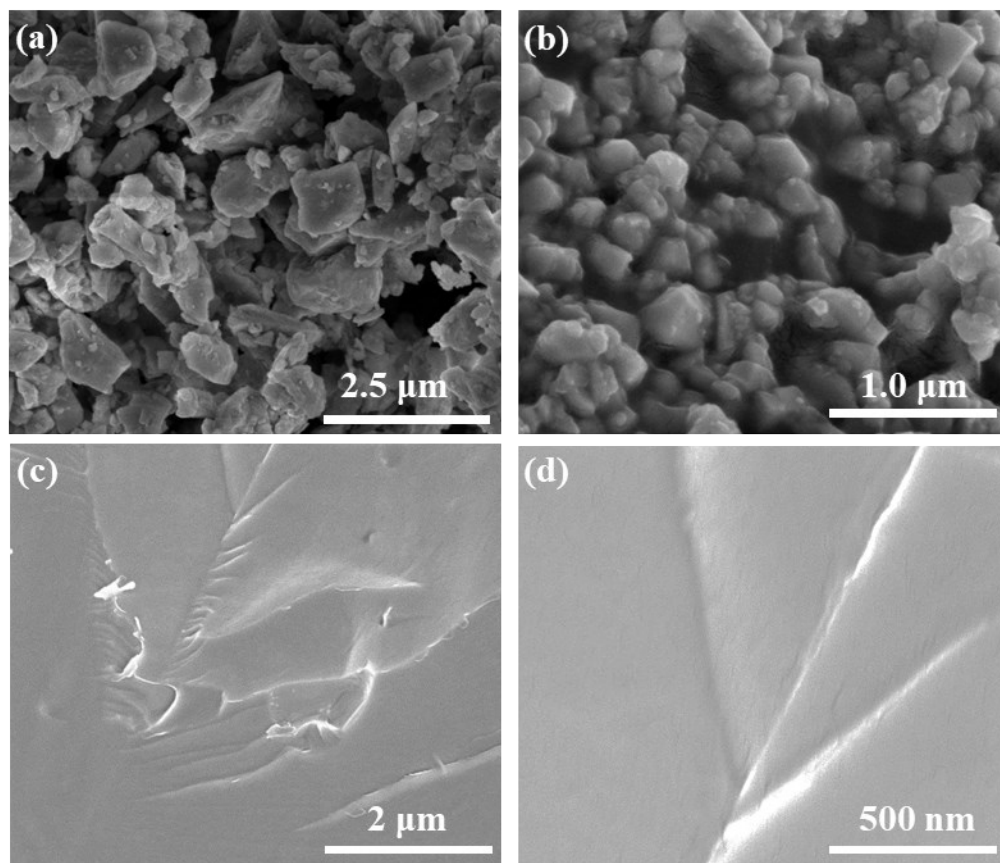

16

17 **Figure S1:** (a) SEM images of the LLTO particles prepared via the sol-gel method; (b)  
18 SEM images of the LLTO nanoparticles after ball-milling. (c) and (d) High magnification  
19 SEM image of the LLTO membrane.

20 Figure S1 reveals that the as-prepared LLTO particles ranged in size from 1.0–2.0 μm, and  
21 that they were irregularly shaped. After ball milling, LLTO nanoparticles were formed with  
22 an average diameter of 200 nm. The LLTO membrane has a dense and smooth surface with  
23 no grainboundaries.

24

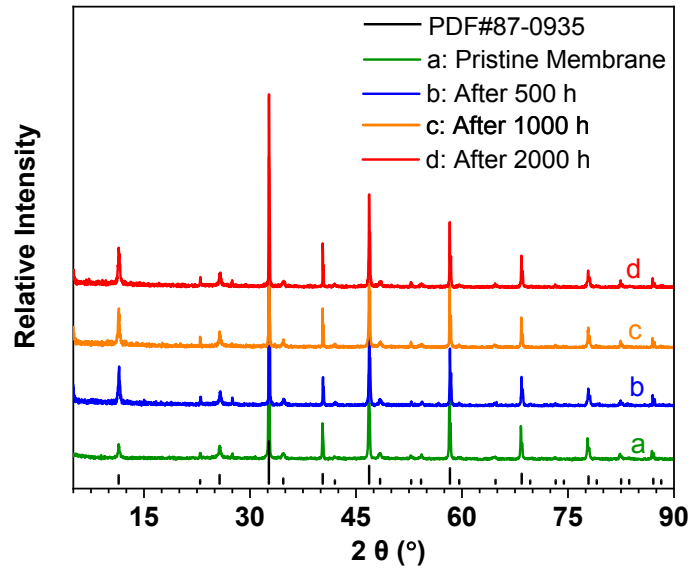

25

26 **Figure S2.** XRD patterns of the LLTO membranes after different durations of usage.

27 Figure S2 shows that the LLTO membrane consists of high-purity  $\text{Li}_{0.33}\text{La}_{0.57}\text{TiO}_3$  without  
28 any impurities being present. The XRD pattern of the LLTO membrane was well preserved  
29 after 2000 h of usage, indicating its good stability and durability.

30

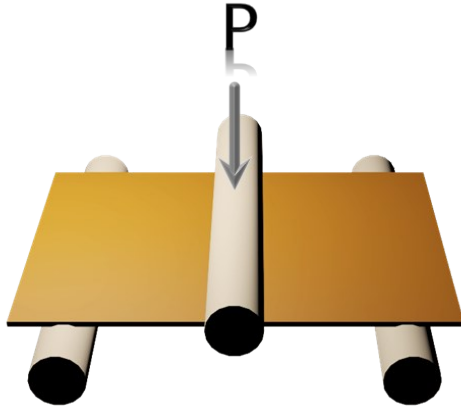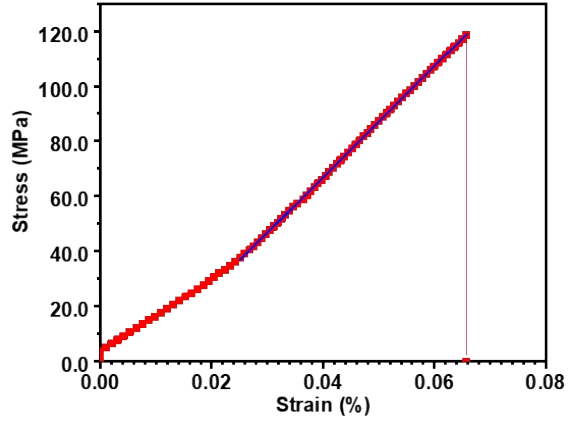

31

32 **Figure S3.** Mechanical property of the LLTO membrane tested by three-point flexural test.

33 The LLTO sample for mechanical property testing was polished into a rectangle with size  
 34 of  $8.0 \times 5.67 \text{ mm}^2$  ( $L' \times W$ ), and then placed on two supporting cylinders. The space ( $L$ , mm)  
 35 between the two supporting cylinders is 6.03 mm. Another cylinder was placed on top of  
 36 the LLTO sample at the middle point, and applied load with a increasing rate of  $0.06 \text{ N}$   
 37  $\text{min}^{-1}$ . The deflection ( $f$ , mm) and loading ( $P$ , N) was recorded using a dynamic mechanical  
 38 analyzer (TA Instruments DMA Q800) at  $25 \text{ }^\circ\text{C}$ . The thickness ( $h$ , mm) of the LLTO  
 39 sample was 0.065 mm. The stress ( $\sigma_f$ ) and strain ( $\varepsilon_f$ ) were calculated to be 118.51 MPa  
 40 and 0.066% by Equation S1 and S2, respectively. The modulus ( $E$ ) was calculated to be  
 41 201.5 GPa from the slope in Figure S3.

42 
$$\sigma_f = \frac{1}{4}PL / \left( \frac{1}{6}Wh^2 \right)$$

Equation S1

43 
$$\varepsilon_f = 6fW/L^2$$

Equation S2

44

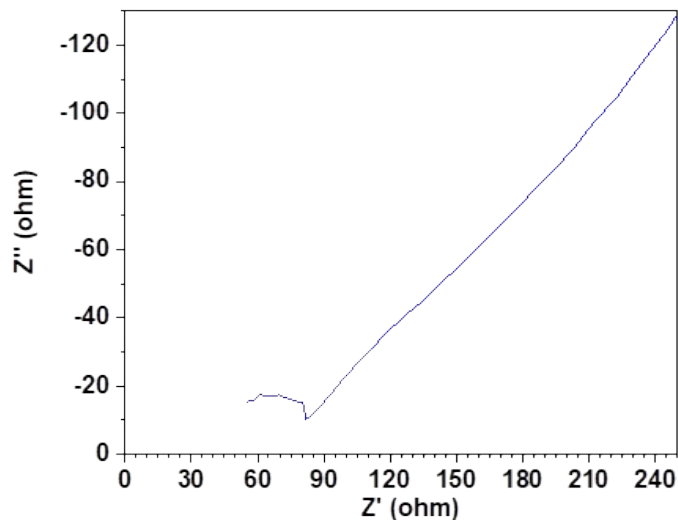

45

46 **Figure S4.** Electrochemical impedance spectroscopy of the LLTO membrane.

47 The electrochemical impedance spectrum of the LLTO membrane was acquired using a  
48 CHI<sup>®</sup> electrochemical workstation between 1.0 MHz and 1 Hz. The sample was initially  
49 sprayed with Ir to give a 15 nm-thick coating, then sandwiched by two carbon cloths to  
50 improve the contact between the membrane and the electrode. The obtained result reveals  
51 the impedance of LLTO membrane was ~82 ohms, indicating its high lithium permeability.

52

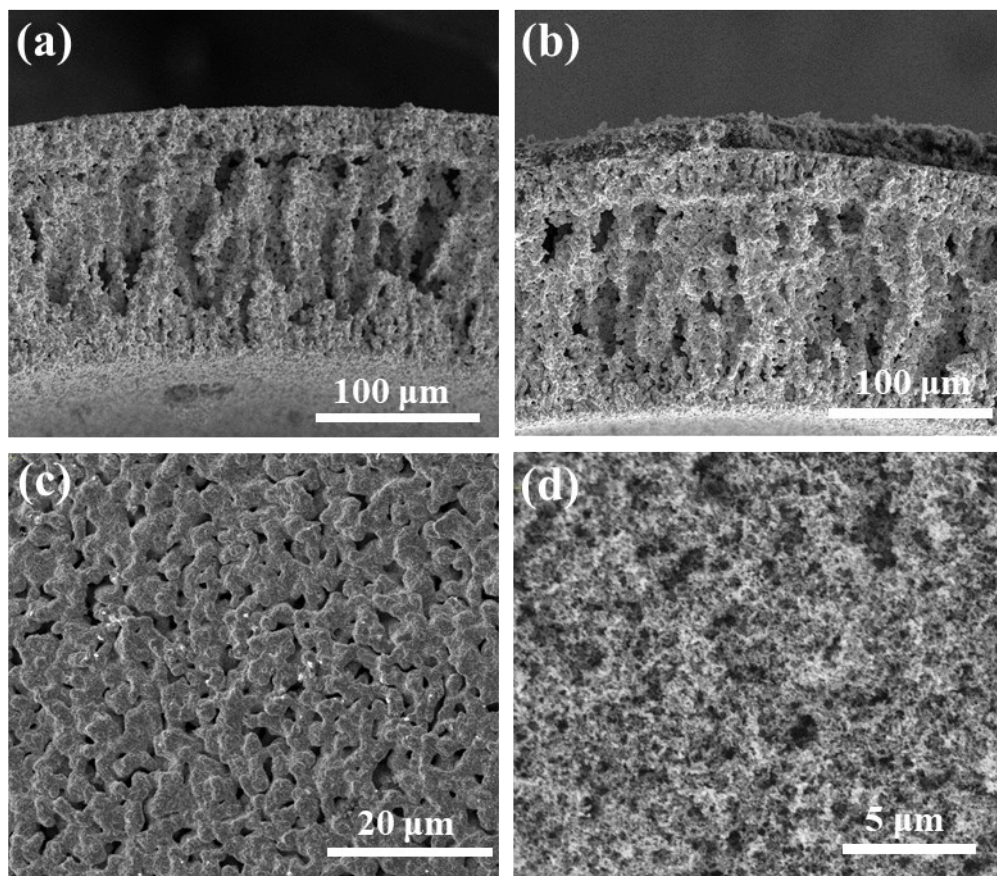

53

54 **Figure S5.** (a) SEM image of the cross-section of the raw copper hollow fibre; (b) SEM  
55 image of the cross-section of the catalytic Pt/Ru coated copper hollow fibre; (c) SEM image  
56 of the outside surface of the raw copper hollow fibre; and (d) SEM image of the outside  
57 surface of catalytic Pt/Ru coated copper hollow fibre.

58

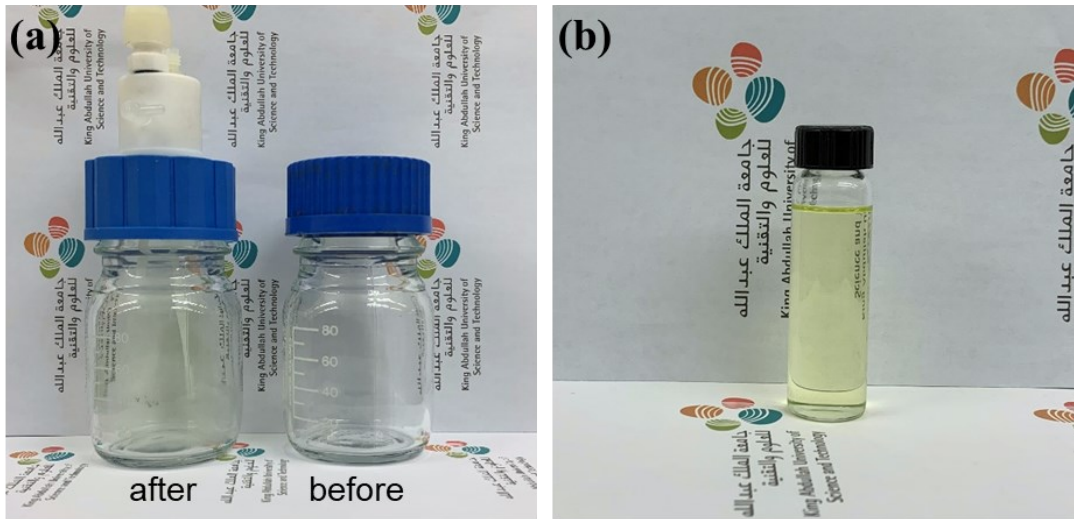

59

60 **Figure S6.** (a) Photographic images of the bottle before and after collection of the released  
 61  $\text{Cl}_2$  during the lithium enrichment process. (b) Photographic image of the  $\text{CCl}_2\text{H}_2$  solution  
 62 after absorption of the released  $\text{Cl}_2$ .

63 Figure S6 shows the  $\text{Cl}_2$  gas collected from the anode compartment of the lithium  
 64 enrichment system. After dissolving in  $\text{CCl}_2\text{H}_2$ , the typical yellow-green appearance of  $\text{Cl}_2$   
 65 can be observed.

66

67

68

69

70

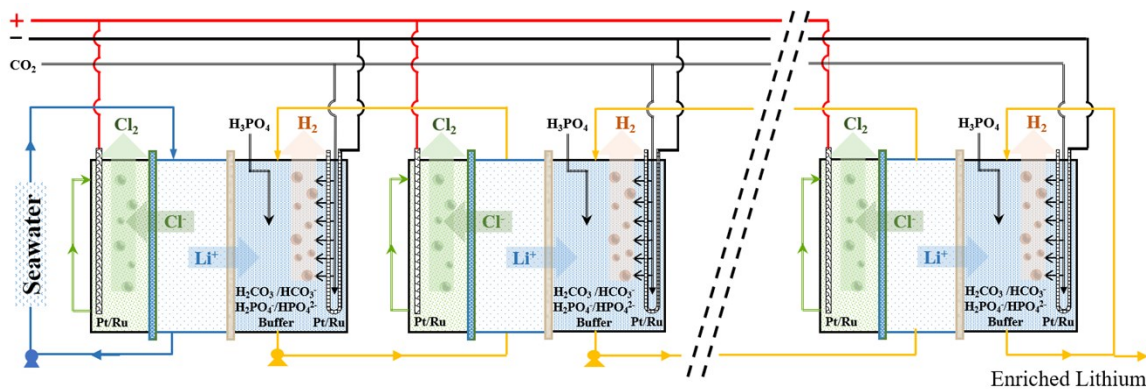

71

72 **Figure S7.** Conceptual design of continuous multi-step membrane process for lithium  
 73 extraction.

74

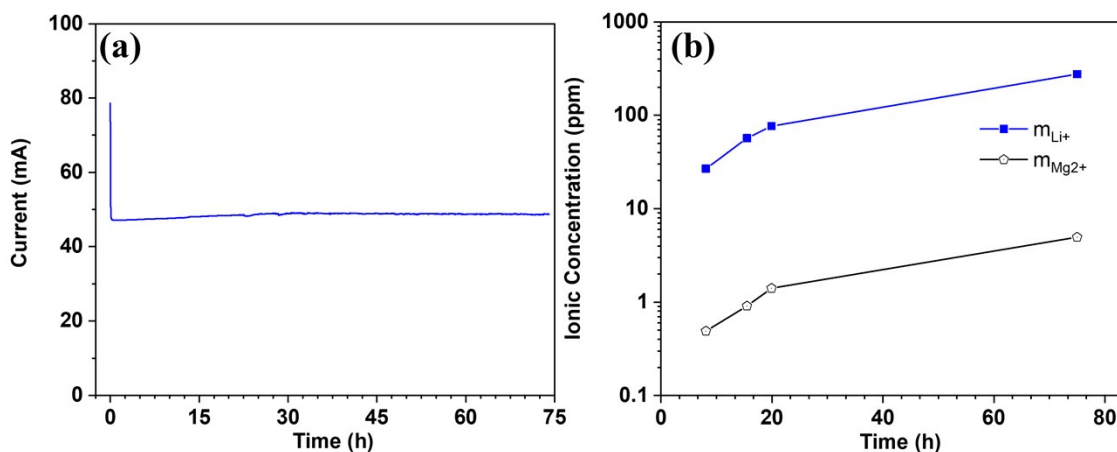

75

76 **Figure S8.** Extended lithium extraction from seawater by a single-step process (membrane  
 77 area = 2.01 cm<sup>2</sup>). (a) Chronoamperometric curve of a single-step lithium extraction from  
 78 seawater for up to 75 hours. (b) Li<sup>+</sup> and Mg<sup>2+</sup> concentrations vs. time in the enriched  
 79 solution.

80 The stable chronoamperometry curves shown in Figure S8a demonstrate that the lithium  
 81 enrichment system can function at a current of  $49 \pm 3 \mu\text{A}$ , and that it exhibits long-term  
 82 stability under these conditions. The Li<sup>+</sup> and Mg<sup>2+</sup> concentrations were tested at 7.5, 15,  
 83 21, and 75 h using ICP-OES, as outlined in Figure S8b. The Li<sup>+</sup> and Mg<sup>2+</sup> concentrations  
 84 increased over time by a ratio of  $\sim 56$ . According to the requirements of lithium battery-  
 85 grade purity (China standard, YS/T582-2013), the Mg<sup>2+</sup> content in the final salt product  
 86 should be  $< 70$  ppm, implying that the Li<sup>+</sup>/Mg<sup>2+</sup> ratio in the enriched lithium solution should  
 87 be  $> 2609$ . This result indicates that a multi-step process is necessary to achieve a high-  
 88 purity product.

89



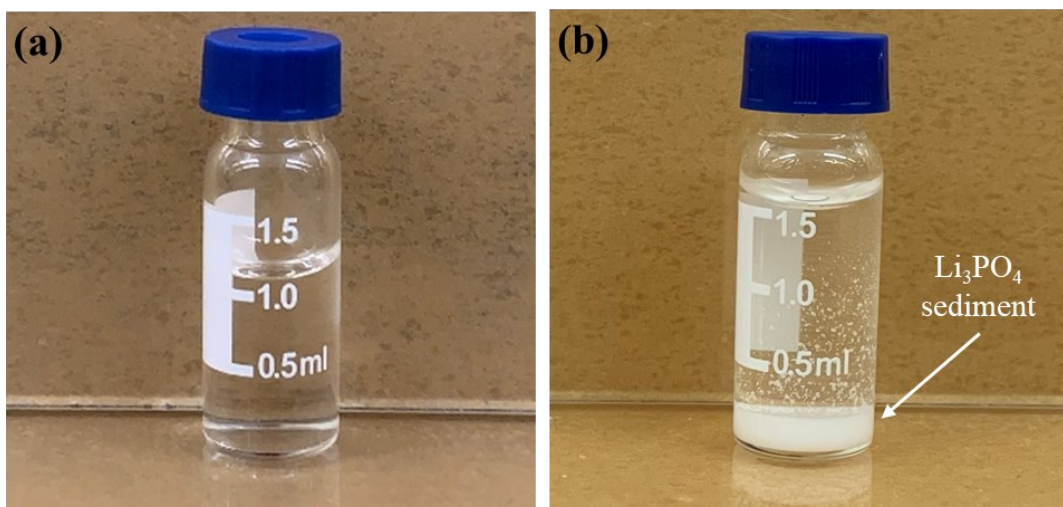

90

91 **Figure S9.** (a) The enriched lithium solution after 5 stages. (b) The  $\text{Li}_3\text{PO}_4$  product  
 92 precipitated from the enriched lithium solution after 5 stages.

93

94

95

96

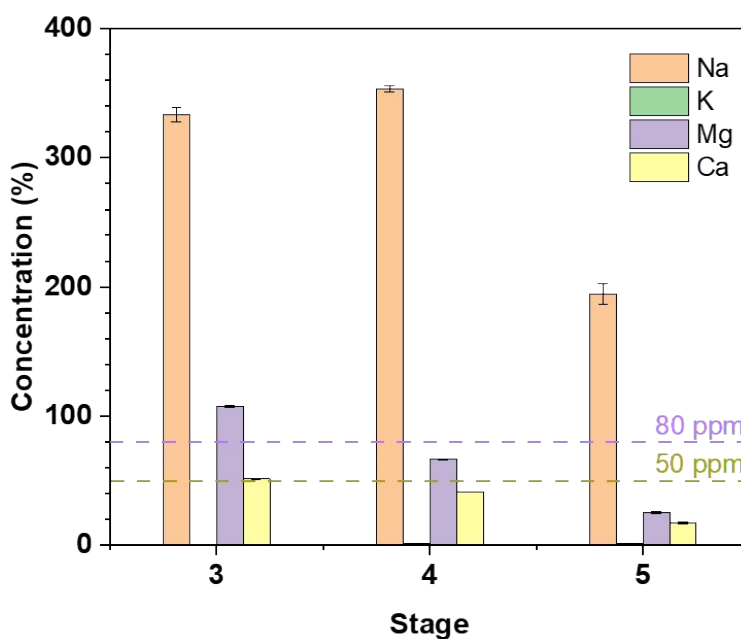

97

98 **Figure S10.** The contents of products precipitated after the 3<sup>rd</sup>, 4<sup>th</sup> and 5<sup>th</sup> stages.

99

100 **Reference:**

- 101 1. Sheng, F., Hou, L., Wang, X., Irfan, M., Shehzad, M.A., Wu, B., Ren, X., Ge, L., and  
102 Xu, T. *J. Membr. Sci.* 2020 **594**, 117453.
- 103 2. Qiu, Y., Yao, L., Tang, C., Zhao, Y., Zhu, J., and Shen, J. *Desalination* 2019 **465**, 1-  
104 12.
- 105 3. Zhao, Z., Liu, G., Jia, H., and He, L. *J. Membr. Sci.* 2020 **596**, 117685.
- 106 4. Hoshino, T. *Fusion Eng. Des.* 2013 **88**, 2956-2959.
- 107 5. Hoshino, T. *Desalination* 2015 **359**, 59-63.
- 108 6. Yang, S., Zhang, F., Ding, H., He, P., and Zhou, H. 2018 *Joule* **2**, 1648-1651.  
109
